1 **Acetobacteraceae in the honey bee gut comprise two distant clades**  
2 **with diverging metabolism and ecological niches**

3

4 Bonilla-Rosso G<sup>1</sup>, Paredes Juan C<sup>2</sup>, Das S<sup>1</sup>, Ellegaard KM<sup>1</sup>, Emery O<sup>1</sup>, Garcia-Garcera  
5 M<sup>1</sup>, Glover N<sup>3,4</sup>, Hadadi N<sup>1</sup>, van der Meer JR<sup>1</sup>, SAGE class 2017-18<sup>5</sup>, Tagini F<sup>6</sup>, Engel  
6 P<sup>1\*</sup>

7

8 <sup>1</sup>Department of Fundamental Microbiology, University of Lausanne, 1015 Lausanne,  
9 Switzerland; <sup>2</sup>International Centre of Insect Physiology and Ecology (ICIPE),  
10 Kasarani, Nairobi, Kenya; <sup>3</sup>Department of Ecology and Evolution, University of  
11 Lausanne, 1015 Lausanne, Switzerland; <sup>4</sup>Swiss Institute of Bioinformatics, 1015  
12 Lausanne, Switzerland; <sup>5</sup>Master of Science in Molecular Life Sciences, Faculty of  
13 Biology and Medicine, University of Lausanne, Switzerland; <sup>6</sup>Institute of  
14 Microbiology, University Hospital Center and University of Lausanne, Lausanne,  
15 Switzerland.

16

17 **\*Author for Correspondence:**

18 Prof. Philipp Engel, Department of Fundamental Microbiology, University of  
19 Lausanne, CH-1015 Lausanne, Switzerland, Tel.: +41 (0)21 692 56 12, e-mail:  
20 [philipp.engel@unil.ch](mailto:philipp.engel@unil.ch)

21

- 22 Key words: *Apis mellifera*, queen, honey bee, Alpha2.1, Alpha2.2, *Commensalibacter*,
- 23 *Bombella*, *Parasaccharibacter*, oxidative fermentation, respiration, genome
- 24 reduction

## 25 **Abstract**

26 Various bacteria of the family Acetobacteraceae are associated with the gut  
27 environment of insects. Honey bees harbor two distinct Acetobacteraceae in their gut,  
28 Alpha2.1 and Alpha2.2. While Alpha2.1 seems to be a gut specialist, Alpha2.2 is also  
29 found in the diet (e.g. royal jelly), the hypopharyngeal glands, and the larvae of honey  
30 bees. Here, we combined amplicon and genome sequencing to better understand  
31 functional differences associated with the ecology of Alpha2.1 and Alpha2.2. We find  
32 that the two phylotypes are differentially distributed along the worker and queen bee  
33 gut. Phylogenetic analysis shows that Alpha2.2 is nested within the acetic acid  
34 bacteria and consists of two separate sub-lineages, whereas Alpha2.1 belongs to a  
35 basal lineage with an unusual GC content for Acetobacteraceae. Gene content analysis  
36 revealed major differences in the central carbon and respiratory metabolism between  
37 the two phylotypes. While Alpha2.2 encodes two periplasmic dehydrogenases to  
38 carry out oxidative fermentation, Alpha2.1 lacks this capability, but instead harbors  
39 a diverse set of cytoplasmic dehydrogenases. These differences are accompanied by  
40 the loss of the TCA cycle in Alpha2.2, but not in Alpha2.1. We speculate that Alpha2.2  
41 has specialized for fast-resource utilization through incomplete carbohydrate  
42 oxidation, giving it an advantage in sugar-rich environments such as royal jelly. On  
43 the contrary, the broader metabolic range of Alpha2.1 may provide an advantage in  
44 the worker bee hindgut, where competition with other bacteria and flexibility in  
45 resource utilization may be relevant for persistence. Our results show that bacteria  
46 belonging to the same family may utilize vastly different strategies to colonize niches  
47 associated with the animal gut.

## 48 **Introduction**

49 According to a recent review on the taxonomy of Alphaproteobacteria (Munoz-  
50 Gomez, et al. 2019) and the standardized genome phylogeny-based taxonomy of  
51 Parks et al. (Parks, et al. 2018), the family Acetobacteraceae (Rhodospirillales) is  
52 comprised of an externally branching acidophilic/neutrophilic group and an internal  
53 acetous group. The latter group includes acetic acid bacteria (AABs), which constitute  
54 the vast majority of the described taxa of the Acetobacteraceae (Komagata, et al.  
55 2014).

56 AAB inhabit sugar-rich environments and use a rather exceptional strategy to gain  
57 energy. They oxidize sugars or sugar alcohols on the periplasmic side of the cell  
58 envelop with the help of membrane-bound dehydrogenases that are linked to the  
59 respiratory chain in a process known as oxidative fermentation (Matsushita and  
60 Matsutani 2016). This particular oxidative metabolism results in the accumulation of  
61 fermentation products (such as acetic acid) in the environment. AABs naturally occur  
62 in association with plants, flowers, and fruits (Bartowsky and Henschke 2008;  
63 Pedraza 2016; Yamada and Yukphan 2008). They also play key roles in food and  
64 beverage fermentations (De Roos and De Vuyst 2018). In addition, AABs are being  
65 increasingly described to be associated with different insect species that rely on  
66 sugar-based diets, such as fruit flies, mosquitoes, sugarcane leafhoppers, mealybugs,  
67 honey bees, and bumble bees (Chouaia, et al. 2014; Crotti, et al. 2010).

68

69 Honey bees feed on a highly sugar-rich diet composed of nectar, honey, and pollen  
70 (Brodschneider and Crailsheim 2010). While their gut microbiota is relatively simple,

71 most of the commonly found phylotypes are specialized to live in the bee gut  
72 environment (Bonilla-Rosso and Engel 2018; Kwong and Moran 2016). These  
73 phylotypes are consistently present in adult worker bees worldwide and belong to  
74 deep-branching phylogenetic lineages that have so far only been detected in different  
75 species of honey bees, bumble bees, and stingless bees (Kwong, et al. 2017). Two of  
76 these phylotypes, originally referred to as Alpha2.1 and Alpha2.2, belong to the  
77 Acetobacteraceae (Cox-Foster, et al. 2007; Martinson, et al. 2011). Both are frequently  
78 detected in adult worker bees. However, in contrast to the so-called core phylotypes  
79 of the honey bee gut microbiota (*Gilliamella*, *Snodgrassella*, *Lactobacillus* Firm4,  
80 *Lactobacillus* Firm5, and *Bifidobacterium*), Alpha2.1 and Alpha2.2 are not present in  
81 every individual worker bee and often their relative abundance is low (Kapheim, et  
82 al. 2015; Kešnerová, et al. 2019; Kwong, et al. 2017; Martinson, et al. 2011; Martinson,  
83 et al. 2012; Moran, et al. 2012; Powell, et al. 2018). Interestingly, they both belong to  
84 the few phylotypes that have repeatedly been found in the gut of the honey bee queen,  
85 which is the only reproductive female in a honey bee colony (Anderson, et al. 2018;  
86 Kapheim, et al. 2015; Powell, et al. 2018).

87 A recent study showed that Alpha2.2 was predominantly found in the mouth, midgut,  
88 and ileum of queens, while Alpha2.1 was more abundant in the rectum (Anderson, et  
89 al. 2018). Moreover, Alpha2.2 has also been detected in royal jelly, floral nectar, bee  
90 bread (i.e. pollen stores of honey bees), and in bee larvae, indicating that this  
91 phylotype can live in more diverse environments than Alpha2.1 (Anderson, et al.  
92 2014; Corby-Harris, et al. 2014; Maes, et al. 2016; Vojvodic, et al. 2013) .

93 Several strains of Alpha2.2 have been isolated, one of which (strain MRM) was  
94 described as a novel species, *Bombella apis* (Yun, et al. 2017). Other isolates of  
95 Alpha2.2 have been referred to as *Candidatus Parasaccharibacter apium* (Corby-  
96 Harris, et al. 2016; Corby-Harris, et al. 2014), but were never formally described as a  
97 novel species. Some strains of Alpha2.2 have been suggested to increase larval  
98 survival under experimental conditions indicating a possible beneficial role of this  
99 phylotype (Corby-Harris, et al. 2014).

100 Genome analysis of a closely related species, *Bombella intestini*, isolated from the gut  
101 of a bumble bee, revealed typical features of other Acetobacteraceae, including the  
102 presence of genes for carrying out oxidative fermentation (Li, et al. 2016; Li, et al.  
103 2015). Draft genomes of several strains of Alpha2.2 have been deposited in public  
104 databases (Corby-Harris and Anderson 2018), and a comparison with a closely  
105 related flower-associated strain, *Saccharibacter floricola*, revealed a number of  
106 potentially adaptive changes (Smith and Newton 2018). However, an in-depth  
107 functional analysis of the gene content and overall metabolic capabilities of Alpha2.2  
108 relative to Alpha2.1 has not been carried out to date.

109 Compared to Alpha2.2, much less is known about the phylotype Alpha2.1.  
110 Phylogenetic trees based on 16S rRNA gene sequences suggest that Alpha2.1 belongs  
111 to a deep-branching lineage within the Acetobacteraceae (Martinson, et al. 2011). The  
112 two most closely related species belong to the candidate genus *Commensalibacter*  
113 (*Commensalibacter* sp. MX-Monarch01 and *Commensalibacter intestini* A911),  
114 isolated from the gut of a butterfly and a fruit fly, respectively (Roh, et al. 2008;  
115 Servin-Garciduenas, et al. 2014). Therefore, the phylotype Alpha2.1 is frequently

116 referred to as *Commensalibacter* sp. While genomes have been published for strains  
117 of all three *Commensalibacter* species (Kim, et al. 2012; Servin-Garciduenas, et al.  
118 2014; Siozios, et al. 2019), little is known about their gene content, metabolic  
119 capabilities, and phylogenetic positioning in respect to other Acetobacteraceae.

120

121 The presence of two phylogenetically related phylotypes from a family known to be  
122 optimized for fast growth in carbohydrate-rich environments prompted us to study  
123 their metabolic niches in the honey bee gut environment. We carried out 16S rRNA  
124 gene-based community analysis, sequenced 12 isolates of Alpha2.1 and Alpha2.2, and  
125 carried out comparative genomic analysis including previously sequenced strains.  
126 We find that the two phylotypes are differentially distributed along the worker and  
127 queen bee gut, and confirm previous studies that show that they belong to distinct  
128 phylogenetic lineages within the Acetobacteraceae. The comparative genome  
129 analysis suggests that the two phylotypes have different strategies to metabolize  
130 carbon sources and to harvest energy. Moreover, we identified several characteristics  
131 of Alpha2.1 that are unique among Acetobacteraceae, which is in agreement with its  
132 position on a deep-branching lineage within the Acetobacteraceae.

## 133 **Materials and Methods**

### 134 **Bee sampling**

135 Four queen bees and four worker bees of the European honey bee (*Apis mellifera*),  
136 were sampled in Summer 2017. Three of each came from different colonies at the  
137 University of Lausanne and one from a professional beekeeper in Western  
138 Switzerland (Imkerei Giger). The guts were dissected into gut compartments (honey  
139 crop, midgut, ileum, and rectum), and homogenized as described in (Ellegaard and  
140 Engel 2019). Each sample was split in two, one of which was used for amplicon  
141 sequencing and the other for bacterial isolation. For the samples used for bacterial  
142 isolation, the four different gut regions were pooled together prior to plating them on  
143 different media.

144

### 145 **Amplicon sequencing**

146 DNA from the different gut samples was isolated using an established CTAB/phenol  
147 extraction protocol (Kesnerova, et al. 2017). The 16S rRNA gene was amplified with  
148 primers 27F and 907R prior to sending the samples for amplicon sequencing analysis  
149 at Microsynth (Switzerland). At Microsynth, the V4 region of 16SrRNA gene was  
150 amplified using universal primers 515F/806R (Caporaso, et al. 2011), and the  
151 amplified fragments were purified and sequenced with the Illumina MiSeq platform  
152 (2x250bp). The number of 16S rRNA gene copies per host actin copy was quantified  
153 through qPCR with universal bacterial primers for honey bee gut (F  
154 5'AGGATTAGATACCCTGGTAGTCC-3', R 5'-YCGTACTCCCCAGGCGG-3') following the  
155 method described by Kešnerová et al. (2017).



156

## 157 **Sequence processing and community analysis**

158 Raw reads were processed and reads with more than 75% of bases below a quality  
159 score of 33 were filtered with FastX-Toolkit (Gordon & Hannon 2010, unpublished,  
160 [http://hannonlab.cshl.edu/fastx\\_toolkit](http://hannonlab.cshl.edu/fastx_toolkit)). Remaining paired reads were merged  
161 with PEAR (Zhang, et al. 2014). Paired reads were quality-filtered, dereplicated,  
162 clustered into OTUs at 97% identity and chimera-filtered with VSEARCH (Rognes, et  
163 al. 2016). OTU abundance was calculated by mapping the total quality-filtered paired  
164 reads to the final clusters using VSEARCH *--usearch\_global*. The resulting abundances  
165 were normalized by the total 16S rRNA gene copy numbers as estimated through  
166 qPCR.

167 Representative OTU sequences were assigned to taxonomic categories with SINA  
168 (v.1.2.11) against SILVA\_132\_NR99 (Pruesse, et al. 2012), and composition was  
169 visualized with PHINCH v.1 (Bik 2014). Differences in copy numbers across samples  
170 were evaluated with an aligned Rank Transformation of a Factorial Model with the R  
171 package ARTool (Kay and Wobbrock 2016). Comparative abundances of Alpha2.1 and  
172 Alpha2.2 were expressed as log-ratios of the normalized copy numbers for all OTUs  
173 assigned to Alpha2.1 (*Commensalibacter*) and Alpha2.2 (*Bombella*).

174

## 175 **Bacterial culturing, DNA isolation, and genome sequencing**

176 Serial dilutions of the gut homogenates were plated on Sabouraud Dextrose Agar  
177 (SDA) or MRS + Mannitol agar and incubated at 35°C in 5% CO<sub>2</sub> incubator. After 3-5  
178 days of incubation, single colonies were picked, restreaked on fresh agar, and

179 incubated for another 2-3 days. Isolates were genotyped with universal bacterial  
180 primers and *rpoB*-specific primers (0937: GAAATTTATGCCGAGGCTGG; 0938:  
181 GAAATTTATGCCGAGGCTGG) as described in Ellegaard et al (2019), and stocked in  
182 MRS broth containing 25% glycerol at -80°C. A total of eight strains of Alpha2.1 and  
183 Alpha2.2 were selected for genome sequencing. Four additional strains were selected  
184 from a previous culturing effort using a similar culturing approach (see **Table S1**).

185

### 186 **Genome sequencing, assembly, and annotation.**

187 For Illumina genome sequencing, genomic DNA was isolated from fresh bacterial  
188 cultures using the GenElute Bacterial Genomic DNA Kit (SIGMA) according to  
189 manufacturer's instructions. Genome sequencing libraries were prepared with the  
190 TruSeq DNA kit and sequenced on the MiSeq platform (Illumina) using the paired-  
191 end 2x250-bp protocol at the Genomic Technology facility (GTF) of the University of  
192 Lausanne. The genome sequence analysis was carried out as described in Ellegaard  
193 et al. (2019). In short, the resulting sequence reads were quality-trimmed with  
194 trimmomatic v0.33 (Bolger, et al. 2014) and assembled with SPAdes v.3.7.1  
195 (Bankevich, et al. 2012). Small contigs (less than 500 bp) and contigs with low kmer  
196 coverage (less than 5) were removed from the assemblies, resulting in 5-22 contigs  
197 per assembly.

198 Two strains, ESL0284 and ESL0368, one from Alpha2.1 and Alpha2.2 each, were  
199 selected for sequencing with PacBio 20K (Pacific Biosciences) single-molecule real-  
200 time (SMRT) technology. High-molecular weight genomic DNA was extracted with the  
201 previously established CTAB/phenol extraction protocol (Kesnerova, et al. 2017). De

202 novo genome assembly was done using the Hierarchical Genome Assembly Process  
203 (HGAP) version 2.3 (Chin, et al. 2013). These two completely assembled genomes  
204 served as references to order the contigs of the Illumina assemblies using MAUVE  
205 v2.4 (Rissman, et al. 2009). The origin of replication was determined based on the GC-  
206 skew and set to position 1 by cutting the contig at the corresponding location. The  
207 same was done for the published complete genome of Alphah2.1 strain AMU001  
208 (Siozios, et al. 2019), but not for any of the other published draft genomes that were  
209 included in the analysis of the gene content (Corby-Harris and Anderson 2018; Smith  
210 and Newton 2018). Assembly quality was checked by remapping reads to assemblies  
211 with the Burrows-Wheeler Aligner (Durbin 2014). The genomes were annotated  
212 using the 'Integrated Microbial Genomes and Microbiomes' (IMG/mer) system (Chen,  
213 et al. 2017).

214

### 215 **Inference of gene families and genome-wide phylogeny.**

216 For the gene content analysis and the inference of the genome-wide phylogeny, we  
217 determined gene families, i.e. sets of homologous genes, across 56 genomes from the  
218 family Acetobacteraceae and other Alphaproteobacteria using OrthoMCL (Li, et al.  
219 2003). We included the 12 newly sequenced strains of Alpha2.1 and Alpha2.2, and 44  
220 previously sequenced strains (including 9 previously sequenced Alpha2.1 and  
221 Alpha2.2 strains and 35 genomes of other Acetobacteraceae and closely related  
222 Alphaproteobacteria). Protein sequences of all CDS of the 56 genomes were searched  
223 against each other using BLASTP. BLASTP hits with an e-value  $<10^{-5}$  and a relative  
224 alignment length of  $>50\%$  of the length of the query and the hit CDS were retained.

225 The OrthoMCL analysis was carried out as recommended with the mcl program run  
226 with the parameters '--abc -I 1.5'. A total of 11,451 gene families were identified. The  
227 remaining CDS (14,453 CDS) were singletons, i.e. they had no detectable homolog in  
228 any other genome in our dataset.

229 A total of 361 single copy orthologs were extracted from the OrthoMCL output (i.e.  
230 gene families having exactly one representative in every genome in the analysis). The  
231 protein sequences of each of these gene families were aligned with mafft (Kato and  
232 Standley 2013) and alignment columns represented by <50% of all sequences  
233 removed. The single gene family alignments were concatenated and used as the basis  
234 for inferring a core genome phylogeny using RAxML (Stamatakis 2014) with the  
235 PROTCATWAG model and 100 bootstrap replicates.

236

### 237 **Comparison of genome structure and divergence.**

238 The R package genoplots was used to compare and visualize whole genome  
239 alignments (Guy, et al. 2010). Pairwise BlastN comparison files were generated using  
240 command line blast v2.2.31+ using a bit score cutoff of 100. To estimate sequence  
241 divergence between genomes, we calculated pairwise ANI with orthoani (Lee, et al.  
242 2016) using the executable "OAT\_cmd.jar" with the parameter "-method ani."

243

### 244 **Comparison of the functional gene content.**

245 To analyze differences in gene content between Alpha2.1 and Alpha2.2, we extracted  
246 all OrthoMCL gene families that contained a homolog in at least one of the 21 genomes  
247 of the two phylotypes of interest and included also singletons, i.e. gene families that

248 had homologs in only one of the genomes. This resulted in a total of 3,275 gene  
249 families identified across 21 genomes of Alpha2.1 and Alpha2.2. These gene families  
250 were categorized into 'shared' and 'specific' core and pan genome subsets depending  
251 on their presence/absence in the genomes of Alpha2.1 and the two sub-lineages of  
252 Alpha2.2. To analyze functional differences between different subsets of core gene  
253 families, we assigned the IMG/mer annotation of one of the homologs (if possible the  
254 one of the complete reference genomes) to each gene family. These annotations were  
255 used to determine the distribution of gene families into COG categories and to identify  
256 the shared and phylotype-specific metabolic capabilities, biosynthetic pathways, and  
257 transport functions based on the analysis of KEGG pathways. For the analysis of the  
258 respiratory chain, we combined several approaches: The characterization of the  
259 electron acceptors was mainly based on KEGG annotations and the previous  
260 publication of the genome of *Bombella intestini* (Li, et al. 2016). To identify  
261 respiratory dehydrogenases we carried out keyword searches with 'dehydrogenase'  
262 and 'reductase', and identified all gene families that belonged to an enzyme class (EC  
263 number) that has been described in the literature as being a respiratory enzyme  
264 (Marreiros, et al. 2016). The TCA cycle analysis was based on KEGG annotations.  
265 For inferring phylogenetic trees of the nitrate reductase subunit alpha (*narG*) and the  
266 nitric oxide reductase, the amino acid sequence of one of the homologs was searched  
267 against the nr database using BLASTP. From the top blast hits, a subset of homologs  
268 identified in divergent strains and species was selected to build a phylogeny using  
269 RAXML. The most similar homologs present among Acetobacteraceae were identified

- 270 by carrying out a second BLASTP search against nr by restricting hits to the family
- 271 Acetobacteraceae (taxid:433).

## 272 **Results**

### 273 **Community analysis of the gut microbiota of worker bees and queens suggests** 274 **different niches of Alpha2.1 and Alpha2.2.**

275 Bacteria of the Acetobacteraceae Alpha2.1 and Alpha2.2 have been reported to be  
276 dominant community members of the gut microbiota of adult honey bee queens  
277 (Anderson, et al. 2018; Corby-Harris, et al. 2014; Kapheim, et al. 2015; Tarpy, et al.  
278 2015), and can also be abundant in the crop of worker bees (Corby-Harris, et al.  
279 2014). To corroborate these previous results and obtain additional insights about the  
280 distribution and relative contribution of these phylotypes to the gut microbiota, we  
281 determined total bacterial loads and community composition in four different gut  
282 compartments (crop, midgut, ileum, and rectum) of honey bee queens and worker  
283 bees.

284

285 qPCR analyses revealed significant differences in total 16S rRNA gene copy number  
286 across castes (i.e. queens and workers) and gut regions ( $F_{caste}=15.7$ ,  $F_{gut}=13.9$ ,  $p<0.05$ ,  
287 **Figure 1A**), with the largest difference being that queens had significantly smaller  
288 bacterial loads than workers. The largest bacterial loads were found in the rectum,  
289 and the smallest in the crops, as reported in previous studies (Martinson, et al. 2012;  
290 Powell, et al. 2018). The only gut region where the queens had significantly larger  
291 loads than the workers was the crop (**Figure 1A**).

292 The community composition differed markedly between castes and gut regions.  
293 Queen guts were characterized by the dominance of family Acetobacteraceae (i.e.  
294 Alpha2.1 and Alpha2.2) across all compartments and a low abundance of

295 *Snodgrassella* (*Neisseriaceae*) and *Gilliamella* (*Orbaceae*), corroborating previous  
296 studies (**Figure 1C**) (Anderson, et al. 2018; Corby-Harris, et al. 2014; Kapheim, et al.  
297 2015; Tarpay, et al. 2015). The family Acetobacteraceae was also present in all gut  
298 compartments of worker bees, but was proportionally much more abundant in the  
299 crop and midgut compared to midgut and rectum. Taking the bacterial loads per  
300 compartment into consideration, the family Acetobacteraceae was most abundant,  
301 and contributed the most to total community composition, in the rectum of queens  
302 (**Figure 1A and 1C**).

303 None of the two Alpha2 phlotypes were exclusively associated with queen guts, but  
304 instead were found in all gut compartments from both castes. The average 16S rRNA  
305 gene copies per actin copy of both phlotypes were consistently higher in workers  
306 than in queens, and overall Alpha2.1 was higher than Alpha2.2. Nevertheless, we  
307 found differences in the ratios between Alpha2.2 to Alpha2.1 within gut  
308 compartments: Alpha2.1 was more abundant in the rectum, and Alpha 2.2 was more  
309 abundant in midguts of both queens and workers (**Figure 1B**). The ratios in the ileum  
310 differed between castes, with Alpha2.2 being more abundant in the queens, and  
311 Alpha2.1 being more abundant in the workers. As expected between individual bees,  
312 we observed large variability across the four replicates, particularly for queen's  
313 crops, but the pattern observed in queens is also in line with that reported in  
314 Anderson et al. (2018).

315 In summary, both phlotypes are found across all gut compartments of queens and  
316 worker bees, but while Alpha2.2 seems to be more abundant and contributes



317 proportionally more to the community in the queen crop and midgut, Alpha2.1 is  
318 much more abundant in the rectum of both castes.

319

320 **Alpha2.1 and Alpha2.2 belong to two distinct phylogenetic clades within the**  
321 **Acetobacteraceae.**

322 To facilitate functional and phylogenetic analysis, we sequenced the genomes of  
323 seven Alpha2.1 and five Alpha2.2 strains (**Table S1**). Eight of the 12 strains were  
324 isolated from the same worker and queen bees that were analyzed in the previous  
325 section. The other four strains were isolated from other worker and queen bees. One  
326 strain of each phylotype was assembled into a single circular chromosome (strain  
327 ESL0284 for Alpha2.1, and strain ESL0368 for Alpha2.2) and served as reference for  
328 our analysis. The assemblies of the other genomes consisted of 5-22 contigs. Genome  
329 size varied little among strains and was comparable between the two phlotypes  
330 ranging from 1.85-2.07 Mb. The overall genome structure was largely conserved in  
331 both phlotypes as based on whole genome alignments with the complete genome of  
332 the reference strain of each phylotype (**Figure S1**).

333

334 To better understand the phylogenetic relationship between Alpha2.1, Alpha2.2, and  
335 other Acetobacteraceae, we inferred a genome-wide tree of the 12 newly sequenced  
336 Alpha2.1 and Alpha2.2 strains, nine previously sequenced Alpha2.1 and Alpha2.2  
337 strains (Corby-Harris and Anderson 2018; Siozios, et al. 2019), and 37 strains of other  
338 Alphaproteobacteria (mainly Acetobacteraceae). This tree revealed that Alpha2.1 and

339 Alpha2.2 are polyphyletic, i.e. belong two distinct clades within the Acetobacteraceae  
340 **(Figure 2)**.

341

342 Alpha2.1 formed, together with the two previously identified strains of the genus  
343 *Commensalibacter*, a deep-branching monophyletic lineage, which was basal to most  
344 AABs within the Acetobacteraceae. However, a relatively long branch separated  
345 Alpha2.1 from the two *Commensalibacter* strains **(Figure 2)** and the average  
346 nucleotide identity (ANI) between their genomes was very low (~70%, see **Table S2**  
347 **and Figure S2**) indicating deep divergence. In contrast, the analyzed strains of  
348 Alpha2.1 were closely related to each other, as evident from the short branches  
349 separating the different strains in the phylogenetic tree **(Figure 2)** and the high ANI  
350 between their genomes (98-99%, see **Table S2 and Figure S2**). This agrees with a  
351 recent metagenomic study, which found that Alpha2.1 belongs to the species with the  
352 lowest extent of strain-level diversity within and between individual honey bees  
353 (Ellegaard and Engel 2019). Our results suggest that Alpha2.1 presents a novel  
354 species of the genus *Commensalibacter*. Notably, the genomes of Alpha2.1 and the two  
355 strains of *Commensalibacter* had a very low GC content (~37%) relative to all other  
356 sequenced Acetobacteraceae, which is usually between 50-60% **(Table S1)**,  
357 providing further evidence for their distinctive position within this family.

358

359 In contrast to the basal position of Alpha2.1 in the acetous group of the  
360 Acetobacteraceae, our phylogeny revealed that Alpha2.2 is nested within the  
361 *Gluconobacter* clade and is most closely related to *S. floricola* DSM 15669. The

362 sequenced Alpha2.2 strains clustered into two sub-lineages (**Figure 2**) that were  
363 separated by a well-supported branch leading to *Bombella intestini* R-52487, a  
364 species previously isolated from the gut of a bumble bee (**Figure 2**) } (Li, et al. 2015).  
365 ANI values between strains of the same sub-lineage were relatively high (92-99%),  
366 while ANI values between strains of the two different sub-lineages were low (74-  
367 75%, see **Table S2 and Figure S2**). No genome sequence is currently available for the  
368 designated type strain MRM of the described species *B. apis* (Yun, et al. 2017).  
369 However, based on 16S rRNA sequence similarity, this strain could undoubtedly be  
370 assigned to one of the two sub-lineages (**Figure S3**). We will refer to this sub-lineage  
371 as '*Bombella apis*', while sub-lineage A2.2-2 may represent a new species of the genus  
372 *Bombella*.

373 Taken together, we can conclude that while the sequenced *Bombella* strains clearly  
374 belong to the acetous group, more precisely to the *Gluconobacter* clade, the deep-  
375 branching basal position of Alpha2.1 suggests that it belongs either to an early  
376 diverging clade within the acetous group, or to a yet unexplored third subgroup. This  
377 calls for further taxonomic analyses, since the atypical GC content of the Apha2.1  
378 genomes might confound the position in the phylogeny.

379

### 380 **Functional similarities between Alpha2.1 and Alpha2.2 based on the shared** 381 **core gene content.**

382 To compare the functional gene content of Alpha2.1 and Alpha2.2, we clustered  
383 homologous genes of the two phlotypes into gene families and looked at their  
384 distribution across the 21 analyzed genomes. A total of 3,275 gene families were

385 identified (including singletons), of which 1,006 were conserved across all strains,  
386 hereafter referred to as the shared core genome of Alpha2.1 and Alpha2.2 (**Figure**  
387 **3A, Table S3**).

388

389 Inspection of the shared core genome revealed that Alpha2.1 and Alpha2.2 have  
390 similar biosynthetic capabilities as other proteobacterial bee gut symbionts (Kwong  
391 and Moran 2016). Both phylotypes encode complete gene sets for the biosynthesis of  
392 all amino acids (except for alanine), peptidoglycan, LPS, and five vitamins (riboflavin  
393 (vitamin B<sub>2</sub>), nicotinate (vitamin B<sub>3</sub>), pantothenate (vitamin B<sub>5</sub>), pyridoxine (vitamin  
394 B<sub>6</sub>), and tetrahydrofolate (vitamin B<sub>9</sub>)) (**Figure 3C and 3D, Figure S4**). In contrast to  
395 most symbionts in the honey bee gut, Alpha2 lineages code for pathways for the *de*  
396 *nov*o synthesis of purine and pyrimidine nucleosides. The dihydroorotate  
397 dehydrogenase (E.C. 1.2.5.2) in Alpha2.1 is quite divergent, with higher identity to its  
398 homologues in *Gilliamella* (~64%) than those in Alpha2.1 (~24%). The gene is  
399 adjacent to *uup*, involved in transposon excision in *E. coli* (Carlier, et al. 2012),  
400 suggesting it has been acquired by HGT. Notwithstanding, all genomes from Alpha2.1  
401 code for a symporter for the uptake of environmental orotate, suggesting it can also  
402 satisfy its need for this nucleoside precursor extracellularly. The *de novo* nucleoside  
403 biosynthesis is costly, and several gut symbionts lack these functional pathways,  
404 preferring their uptake from the environment as evidenced by nucleoside depletion  
405 in the bee gut in the presence of microbiota (Kesnerova, et al. 2017). Alpha2.2  
406 genomes code for an adenosine importer, which in turn can be interconverted with  
407 inosine, xanthine and guanosine. This suggests that Alpha2.2, like most other bee gut

408 symbionts, prefers to acquire these DNA and RNA building blocks from the  
409 environment rather than synthesizing them *de novo*.

410 All analyzed strains encoded a complete gene set of the Embden-Meyerhof-Parnas  
411 (EMP) pathway except for a homolog of the 6-phosphofructokinase gene (*pfkA*,  
412 EC:2.7.1.11), indicating that Alpha2.1 and Alpha2.2 are both capable of performing  
413 gluconeogenesis but incapable of carrying out glycolysis. However, all strains  
414 harbored the necessary genes to incorporate sugars and sugar acids via the Pentose  
415 phosphate pathway (PPP) into intermediate cellular metabolites (**Table S4, Figure**  
416 **3C and 3D, Figure S4**). In addition, all strains of Alpha2.2 carried a 6-  
417 phosphogluconate dehydratase (*edd*, EC 4.2.1.12) and a 2-keto-3-deoxy-6-  
418 phosphogluconate (*eda*, EC 4.1.2.14), which allows them to use the Entner-Doudoroff  
419 pathway (ED).

420 Analysis of the shared core genome content also revealed that both phylotypes - like  
421 most other Acetobacteraceae (Matsushita and Matsutani 2016)- carry out oxidative  
422 phosphorylation and rely on oxygen as the final electron acceptor (**Figure S4, Figure**  
423 **4A, Table S4**). They encoded genes of the respiratory complex III  
424 ubiquinol:cytochrome *bc1* reductase, which can transfer electrons from the quinone  
425 pool to different cytochrome *c*-containing proteins. While they lacked genes for the  
426 complex IV COX-type cytochrome *c* terminal oxidase (*coxABC*), both lineages carried  
427 genes coding for two ubiquinol-dependent terminal oxidases: *ctaAB* and *cydCBA* for  
428 the cytochrome *bo3* oxidase, and *cydAB* for the low oxygen affinity cytochrome *bd*  
429 oxidase (Matsushita and Matsutani 2016). Overall, this suggest that both lineages  
430 heavily rely on utilizing the ubiquinone pool to transfer electrons.

431 One of the hallmarks of the Acetobacteraceae metabolism is the production of acetate  
432 from ethanol via acetaldehyde (De Roos and De Vuyst 2018). Although both lineages  
433 carried genes for NADH-producing alcohol dehydrogenases to convert ethanol into  
434 acetaldehyde (EC:1.1.1.1, EC:1.1.1.284,) none of them was a homolog of the  
435 ubiquinone-dependent PQQ alcohol dehydrogenases characteristic of acetate  
436 production and responsible in *Acetobacter pomorum* to induce the host insulin  
437 signaling pathway of *Drosophila* resulting in increased growth and development  
438 (Shin, et al. 2011). Moreover, none of the lineages carried genes for the subsequent  
439 production of acetaldehyde to acetate (EC:1.2.1.-), nor for acetate transport  
440 (COG1584). This means that none of the lineages produce ethanol through oxidative  
441 fermentation nor are they acetate producers, two characteristic reactions of  
442 Acetobacteraceae.

443

#### 444 **Functional differences between Alpha2.1 and Alpha2.2 based on the phylotype-** 445 **specific gene content**

446 Although sharing many metabolic capabilities, Alpha2.1 and Alpha 2.2 each harbored  
447 a considerable number of phylotype-specific core gene families, i.e. gene families  
448 present across all analyzed strains of one phylotype, but absent from all strains of the  
449 other phylotype (**Figure 3A, Table S5**): 483 and 407 gene families for Alpha2.1 and  
450 Alpha2.2, respectively. The number of core gene families specific to each of the two  
451 sub-lineages of Alpha2.2 was relatively small: 45 gene families for *B. apis* and 24 gene  
452 families for *Bombella sp.* All three groups (i.e. Alpha2.1, *B. apis*, and *B. sp.*) also  
453 harbored a relatively large flexible gene pool (i.e. gene families present in only a

454 subset of the strains), as indicated by the total number of gene families in each group  
455 (i.e. pan genome) as compared to the core genome (**Figure 3A, Table S5**).

456

457 The 483 and 407 phylotype-specific core gene families belonged to a wide range of  
458 COG categories suggesting differences in diverse metabolic functions. However, four  
459 COG categories stood out as being particularly abundant among the Alpha2.1-specific  
460 core gene content as compared to the shared core gene content (**Figure 3B**): ‘Energy  
461 production and conversion’ (COG C), ‘Carbohydrate transport and metabolism’ (COG  
462 G), ‘Coenzyme transport and metabolism’ (COG H), and ‘Inorganic ion transport and  
463 metabolism’ (COG P). Gene families of these particular categories encoded a relatively  
464 large number of dehydrogenases/oxidoreductases, putative transporters for  
465 nitrate/nitrite, sulfate, and iron, and nearly complete gene sets for the synthesis of  
466 vitamin B<sub>1</sub> (thiamine), vitamin B<sub>12</sub>, and the co-factor molybdopterin, all of which  
467 were absent from Alpha2.2. Interestingly, several genes linked to the TCA cycle were  
468 also specific to Alpha2.1 (**Figure 3C and 3D**).

469

470 Among the Alpha2.2-specific core gene content two COG categories were particularly  
471 abundant compared to the shared core genome (**Figure 3B**): ‘Inorganic ion transport  
472 and metabolism’ (i.e. COG P) and ‘Cell motility’ (i.e. COG N). Almost all gene families  
473 in the category ‘Cell motility’ coded for different flagella subunits, suggesting that  
474 Alpha2.2, but not Alpha2.1, is motile (**Figure 3C and 3D**). Gene families in ‘Inorganic  
475 ion transport and metabolism’ encoded for diverse transporters, in particular for iron  
476 and phosphate. All *Bombella* strains also harbored genes encoding the redox cofactor

477 pyrroloquinoline quinone (PQQ) and a PQQ-dependent glucose dehydrogenase  
478 involved in respiration (see below). Another notable difference between the two  
479 phylotypes was that Alpha2.2 encoded an entire CRISPR/CAS9 system, while  
480 Alpha2.1 was lacking any homolog of these antiviral defense systems (**Figure 3C and**  
481 **3D**).

482

### 483 **Major differences in respiratory chain and TCA cycle between Alpha2.1 and** 484 **Alpha2.2.**

485 Both phylotypes seem to carry out aerobic respiration to gain energy. However, the  
486 presence of various dehydrogenases and TCA cycle genes among the phylotype-  
487 specific gene content suggested differences in the energy metabolism (**Table S5**). We  
488 identified 16 membrane-associated dehydrogenase/reductases likely to be involved  
489 in electron transport respiratory chain hence the production of energy (**Figure 4,**  
490 **Table S6**).

491 Six dehydrogenase/reductase gene families were present among the shared gene  
492 content of Alpha2.1 and Alpha2.2, three of which are electron donors (a D-lactate  
493 dehydrogenase, a complex I type-II NADH dehydrogenase, and a putative membrane-  
494 bound dehydrogenase), and three of which are electron acceptors, namely the  
495 ubiquinol:cytochrome *bc1* complex III and the two terminal electron acceptors  
496 cytochrome *bo3* and *bd* ubiquinol oxidases. and *bo3*). These consist of the common  
497 respiratory metabolism shared between the two lineages. The remaining 11  
498 dehydrogenases/reductases belonged to the phylotype-specific core gene content  
499 (i.e. were present in all strains of one phylotype but absent from the other).



500 Eight of these phylotype-specific dehydrogenases/reductases were only present in  
501 Alpha2.1. Six dehydrogenases are electron donors to ubiquinone from oxidation of  
502 succinate, NADH (one *nuo*/type-I in addition to the shared *ndh*/type-II), glycerol-3-  
503 phosphate, malate and the aforementioned dihydroorotate dehydrogenase(**Figure**  
504 **4A, Table S6**). The type I NADH dehydrogenase and the nitrate reductase are proton-  
505 pumping enzymes that directly contribute to the production of energy (Marreiros, et  
506 al. 2016). Both enzyme complexes are dependent on the cofactor molybdopterin,  
507 which explains the presence of the corresponding biosynthesis genes in the genomes  
508 of Alpha2.1, but not Alpha2.2. The genes encoding the co-factor and the nitrate  
509 reductase are located in the same genomic island and have best blast hits to Gamma-  
510 and Betaproteobacteria, suggesting acquisition by HGT (**Figure S5**). (**Figure 4A**). .  
511 The other two terminal oxidases are nitrate and nitric oxide reductases, which  
512 suggest that Alpha2.1 has the capability to carry out anaerobic respiration (Figure  
513 4A). Homologs of the gene encoding the nitric oxide reductase were not present in  
514 any other closely related *Acetobacteriaceae* strain (i.e. other *Commensalibacter* sp.)  
515 suggesting a specific role for Alpha2.1 and acquisition by HGT as is common for  
516 denitrification enzymes (Jones, et al. 2008) (**Figure S6**).  
517 Only three dehydrogenases were specific to Alpha2.2: a different dihydroorotate  
518 dehydrogenase, the above mentioned PQQ-dependent glucose dehydrogenase, and a  
519 gluconate-2-dehydrogenase (**Figure 4B**). The last two catalyze the periplasmic  
520 conversion of glucose into gluconate and gluconate into 2-keto-gluconate, and are  
521 characteristic of the oxidative fermentation pathway common to most  
522 Acetobacteraceae. This is in contrast to Alpha2.1, which lacked genes encoding

523 periplasmic dehydrogenases and hence seems not able to carry out oxidative  
524 fermentation.

525

526 We also identified major differences in the TCA cycle between the two phylotypes. All  
527 strains of Alpha2.1 harbored the full gene set of the TCA cycle, including an  
528 acetate:succinate CoA-transferase gene (*aarC*) for metabolizing acetate to acetyl-CoA  
529 (Mullins, et al. 2008), a typical feature of the TCA cycle of Acetobacteraceae thought  
530 to be an adaptation to the high amounts of acetate produced by some of them (**Figure**  
531 **4C**). In contrast, the TCA cycle was incomplete across strains of Alpha2.2 to different  
532 degrees. While in the sub-lineage of *B. apis* the enzymatic steps from succinyl-CoA to  
533 fumarate (two steps) and from malate to oxaloacetate (one step) were missing, the  
534 strains of the other sublineage were also missing genes for the conversion of acetyl-  
535 CoA to 2-oxoglutarate (four steps). Several Acetobacteraceae have been reported to  
536 harbor partial or modified TCA cycles, especially those that utilize oxidative  
537 fermentation to gain energy (Brown and Wernegreen 2019; Mullins, et al. 2008).  
538 However, in none of them the pathway seems to be as reduced as in this particular  
539 sublineage of *Bombella* (**Figure 4D**).

540 Intriguingly, the fate of malate in the two phylotypes is markedly different. Alpha2.1  
541 displays a malate:quinone oxidoreductase as part of the conversion of malate to  
542 oxaloacetate in the TCA cycle. This enzyme is an alternative that contributes to both  
543 the proton motive force through proton pumping and the ubiquinone pool with  
544 electrons. Malate can also be converted into pyruvate and CO<sub>2</sub> through malate  
545 dehydrogenases. Alpha2.1 codes for the NADP-dependent *maeB* (EC 1.1.1.40), and

546 Alpha2.2 codes for a NAD-dependent *maeA* (EC 1.1.1.38). The latter is found adjacent  
547 to the class-II fumarase *fumC* (EC 4.2.1.2) in the Alpha2.2 genomes, that also lack the  
548 genes to generate fumarate from succinate, and hence must rely on fumarate  
549 produced through other anabolic pathways such as the urea cycle or aspartate  
550 metabolism.  
551

## 552 **Discussion**

553 The two Acetobacteraceae, Alpha2.1 and Alpha2.2, are common members of the bee  
554 gut microbiota. They have been repeatedly identified by 16S rRNA gene sequence  
555 analyses in samples from the bee gut or the hive environment and several studies  
556 have provided important insights about their ecology (Cox-Foster, et al. 2007;  
557 Kapheim, et al. 2015; Kešnerová, et al. 2019; Kwong, et al. 2017; Martinson, et al.  
558 2011; Martinson, et al. 2012; Moran, et al. 2012; Powell, et al. 2018; Vojvodic, et al.  
559 2013). However, a comparative analysis between their genomes had not been carried  
560 out. Our study provides new insights about the phylogenetic relationship of Alpha2.1  
561 and Alpha2.2, their functional gene content, and their metabolic and genomic  
562 differences.

563

564 We show that Alpha2.1 and Alpha2.2 belong to two distant phylogenetic clades within  
565 the Acetobacteraceae, confirming previous findings (Martinson, et al. 2011), and  
566 determining their taxonomic position more precisely. Alpha2.2 is part of the acetous  
567 group and falls within the genus *Bombella*, to which also *B. intestini* belongs (Li, et al.  
568 2015). However, the Alpha2.2 strains isolated from honey bees belong to two  
569 divergent sub-lineages within the genus *Bombella*. The species formally described as  
570 *B. apis* (Yun, et al. 2017) and strains referred to as *Candidatus* 'Parasaccharibacter  
571 apium' and the undescribed strains *Saccharibacter* sp. 3.A.1 (Veress, et al. 2017)  
572 belong to the same sub-lineage, are identical or nearly identical in the 16S rRNA gene,  
573 and share high ANI with each other. While we acknowledge that the name  
574 'Parasaccharibacter apium' has been proposed first (Corby-Harris, et al. 2014), it has

575 never been formally described as a novel genus, and thus we propose that these  
576 closely related strains should be consistently referred to as *Bombella apis* (Yun et al.  
577 2017).

578 The second sub-lineage of Alpha2.2 represents a putative novel species within the  
579 genus *Bombella* based on its genomic divergence and paraphyletic position relative  
580 to *B. apis*. The TCA cycle is almost completely lost in this sub-lineage suggesting  
581 distinctive functional capabilities as compared to *B. apis*. How prevalent this sub-  
582 lineage is across honey bee colonies, and whether it colonizes a different niche than  
583 *Bombella apis* remains to be determined.

584

585 The second phylotype, Alpha2.1, belongs to a highly divergent lineage within the  
586 Acetobacteraceae and is likely to represent a novel species within the genus  
587 *Commensalibacter*. The only three taxa which are known from this lineage have been  
588 isolated from insect guts, and all three display an atypical GC content compared to  
589 other Acetobacteraceae. Future sampling of bacteria from this lineage will help to  
590 solidify its position within the Acetobacteraceae phylogeny and to test if this lineage  
591 harbors exclusively insect gut-associated symbionts.

592 Despite the fact that Alpha2.1 and Alpha2.2 are both Acetobacteraceae and can  
593 colonize the same environment (i.e. the bee gut), we found major differences in their  
594 metabolic and respiratory capabilities. While both rely on the ubiquinone pool and  
595 oxygen- and ubiquinone-dependent terminal oxidases (and hence are aerobic),  
596 Alpha2.1 is also able to respire nitrate and nitric oxide, making it a facultative  
597 anaerobe.

598 The most important metabolic difference between the two phylotypes lies in their  
599 energy and central carbon metabolism. Alpha2.2 exhibits a simple metabolism that  
600 relies on the periplasmic oxidative fermentation of glucose and gluconate. Although  
601 it carries genes to incorporate these intermediates through the ED or PP pathways,  
602 this is unlikely, since most Acetobacteraceae accumulate 5-keto-D-gluconate  
603 extracellularly (Bringer and Bott 2016), including *B. apis* (Yun, et al. 2017), and it has  
604 been shown that a very small proportion of glucose and gluconate is incorporated  
605 into the cell during oxidative fermentation in *Gluconobacter oxidans*.. This, together  
606 with a highly reduced TCA cycle that appears to retain only steps involved in other  
607 biosynthetic pathways, suggest that Alpha2.2 has a streamlined and rigid metabolism  
608 optimized for low-yield but rapid energy production from glucose without  
609 incorporation into biomass. This has been shown to occur when growth rate is slower  
610 than the reducing equivalent production rate in marine cyanobacteria (Braakman, et  
611 al. 2017), and may provide Alpha2.2 strains an advantage in glucose-rich  
612 environments, such as royal jelly (Simo and Christensen 1962). Worker bees secrete  
613 glucose oxidase into royal jelly to partly convert glucose into gluconolactone and  
614 hydrogen peroxide for antimicrobial purposes (Fratini, et al. 2016; Ohashi, et al.  
615 1999). Alpha2.2 is able to further oxidize gluconolactone into gluconate (Smith and  
616 Newton 2018) and enter the ED pathway, potentially facilitating its growth in royal  
617 jelly.

618 In contrast to Alpha2.2, Alpha2.1 displays a wider range of primary electron donors  
619 that includes several organic acids and NADH, but does not permit oxidative  
620 fermentation. It carries the complete acetate-driven TCA cycle typically found in

621 Acetobacteraceae, which is a low-yield variant already optimized for rapid resource  
622 consumption and replenishment of TCA intermediates while retaining steps needed  
623 to provide precursors for multiple biosynthetic pathways. A larger range of carbon  
624 substrate utilization fits a lifestyle that is more specialized to the honey bee hindgut.  
625 In support of this, a recent study showed that while many transient bacteria  
626 (including Alpha2.2) diminished or completely disappeared in long-lived winter bees,  
627 Alpha2.1 persisted in the gut environment and even significantly increased relative  
628 to foragers and nurses sampled in summer (Kešnerová, et al. 2019). The same pattern  
629 was also observed for another community member of the bee gut microbiota,  
630 *Bartonella apis*. Like Alpha2.1 this species relies on aerobic respiration (Segers, et al.  
631 2017), in contrast to most other members, which are anaerobic fermenters. However,  
632 the metabolic or physicochemical conditions in the hindgut of winter bees that favor  
633 the growth of Alpha2.1 or *Bartonella apis* over other microbiota members is currently  
634 unclear.

635 In summary, we have shown that the two honey bee-associated Acetobacteraceae  
636 phylotypes both display adaptations towards fast growing metabolism, but in two  
637 markedly different ways. Alpha2.1 harvests energy from a broad-range of substrates  
638 and links substrate utilization with a flexible metabolism of oxidative and  
639 biosynthetic pathways, whereas Alpha2.2 has streamlined its metabolism by using  
640 oxidative fermentation for rapid energy harvesting from glucose, almost exclusively  
641 because of the loss of alternative oxidative pathways. Our results exemplify how  
642 physiological and metabolic differences may drive niche differentiation in terms of

643 resource utilization and spatial distribution, facilitating the coexistence of  
644 phylogenetically related bacteria in the honey bee gut.

645

646



## 647 **Acknowledgments**

648 Participants of the Master in Molecular Life Sciences at the University of Lausanne,  
649 class 2017-2018 (Marie-Pierre Meurville, Maxime Brunner, Jonathan Klopfenstein,  
650 Baptiste Micheli, Tess Bonato, Alice Wallef, Alicia Zufferey, Andrea Dos Santos,  
651 Augustine Jaccard, Béatrice Tappy, Boris Schnider, Christèle Aubry, Clara Heiman,  
652 Dinis Barros, Emilie Ha, Giti Ghazi Soltani, Henri Paratte, Ilaria Bernabei, Imre  
653 Banlaki, Julien Dénéreaz, Karim Saied, Liza Darrous, Lucas Beurret, Lucas Serra  
654 Moncadas, Lucien Roesch, Ludivine Brandt, Lydia Horwath, Margot Delavy, Maria  
655 Chadiarakou, Maria Hadres, Mathieu Quinodoz, Maxence Trottet, Pascal Roth, Perrine  
656 Steffe, Robin Hofmeister, Béatrice Tappy, and Vishwachi Tripathi) conducted  
657 preliminary research as part of the ‘Sequence-a-genome’ (SAGE) graduate course. We  
658 thank the School of Biology of the University of Lausanne for financial support, and  
659 the Competence Centre in Bioinformatics and Computational Biology of the Swiss  
660 Institute of Bioinformatics (SIB) for providing access to high-performance  
661 computation through the Vital-IT cluster (<http://vital-it.ch>). This research was funded  
662 through the School of Biology of the University of Lausanne, and the European  
663 Research Council (ERC-StG ‘MicroBeeOme’), the Swiss National Science Foundation  
664 (grant number 31003A\_160345 and 31003A\_179487) and HFSP (HFSP Young  
665 Investigator grant RGY0077/2016) received by PE.

666

667

## 668 **Data deposition**

669 Genome sequences and Illumina data underlying genome assemblies and 16S rRNA  
670 gene amplicon analysis have been deposited on NCBI under Bioproject accession  
671 PRJNA589199. Codes and data of the analysis can be found via the following  
672 SWITCHdrive link: <https://drive.switch.ch/index.php/s/syuWZAQKKGmQn0h>.

673 These files will be moved to a public Zenodo repository upon publication.

674

## 675 **References**

- 676 Anderson KE, et al. 2014. Hive-stored pollen of honey bees: many lines of evidence  
677 are consistent with pollen preservation, not nutrient conversion. *Mol Ecol* 23: 5904-  
678 5917. doi: 10.1111/mec.12966
- 679 Anderson KE, et al. 2018. The queen's gut refines with age: longevity phenotypes in  
680 a social insect model. *Microbiome* 6: 108. doi: 10.1186/s40168-018-0489-1
- 681 Bankevich A, et al. 2012. SPAdes: a new genome assembly algorithm and its  
682 applications to single-cell sequencing. *J Comput Biol* 19: 455-477. doi:  
683 10.1089/cmb.2012.0021
- 684 Bartowsky EJ, Henschke PA 2008. Acetic acid bacteria spoilage of bottled red wine --  
685 a review. *Int J Food Microbiol* 125: 60-70. doi: 10.1016/j.ijfoodmicro.2007.10.016
- 686 Bik HM 2014. Phinch: An interactive, exploratory data visualization framework for --  
687 Omic datasets. *bioRxiv*: 009944. doi: 10.1101/009944
- 688 Bolger AM, Lohse M, Usadel B 2014. Trimmomatic: a flexible trimmer for Illumina  
689 sequence data. *Bioinformatics* 30: 2114-2120. doi: 10.1093/bioinformatics/btu170
- 690 Bonilla-Rosso G, Engel P 2018. Functional roles and metabolic niches in the honey  
691 bee gut microbiota. *Curr Opin Microbiol* 43: 69-76. doi: 10.1016/j.mib.2017.12.009
- 692 Braakman R, Follows MJ, Chisholm SW 2017. Metabolic evolution and the self-  
693 organization of ecosystems. *Proc Natl Acad Sci U S A* 114: E3091-E3100. doi:  
694 10.1073/pnas.1619573114

- 695 Bringer S, Bott M. 2016. Central Carbon Metabolism and Respiration in  
696 *Gluconobacter oxydans*. In: Matsushita K, Toyama H, Tonouchi N, Okamoto-  
697 Kainuma A, editors. *Acetic Acid Bacteria: Ecology and Physiology*. Tokyo: Springer  
698 Japan. p. 235-253.
- 699 Brodschneider R, Crailsheim K 2010. Nutrition and health in honey bees. *Apidologie*  
700 41: 278-294. doi: 10.1051/apido/2010012
- 701 Brown BP, Wernegreen JJ 2019. Genomic erosion and extensive horizontal gene  
702 transfer in gut-associated *Acetobacteraceae*. *BMC Genomics* 20: 472. doi:  
703 10.1186/s12864-019-5844-5
- 704 Caporaso JG, et al. 2011. Global patterns of 16S rRNA diversity at a depth of millions  
705 of sequences per sample. *Proc Natl Acad Sci U S A* 108 Suppl 1: 4516-4522. doi:  
706 10.1073/pnas.1000080107
- 707 Carlier L, Haase AS, Burgos Zepeda MY, Dassa E, Lequin O 2012. The C-terminal  
708 domain of the Uup protein is a DNA-binding coiled coil motif. *J Struct Biol* 180: 577-  
709 584. doi: 10.1016/j.jsb.2012.09.005
- 710 Chen IA, et al. 2017. IMG/M: integrated genome and metagenome comparative data  
711 analysis system. *Nucleic Acids Res* 45: D507-D516. doi: 10.1093/nar/gkw929
- 712 Chin CS, et al. 2013. Nonhybrid, finished microbial genome assemblies from long-  
713 read SMRT sequencing data. *Nat Methods* 10: 563-569. doi: 10.1038/nmeth.2474
- 714 Chouaia B, et al. 2014. Acetic acid bacteria genomes reveal functional traits for  
715 adaptation to life in insect guts. *Genome Biol Evol* 6: 912-920. doi:  
716 10.1093/gbe/evu062

- 717 Corby-Harris V, Anderson KE 2018. Draft Genome Sequences of Four  
718 *Parasaccharibacter apium* Strains Isolated from Honey Bees. *Genome Announc* 6.  
719 doi: 10.1128/genomeA.00165-18
- 720 Corby-Harris V, et al. 2016. *Parasaccharibacter apium*, gen. nov., sp. nov., Improves  
721 Honey Bee (Hymenoptera: Apidae) Resistance to *Nosema*. *J Econ Entomol* 109: 537-  
722 543. doi: 10.1093/jee/tow012
- 723 Corby-Harris V, et al. 2014. Origin and effect of Alpha 2.2 Acetobacteraceae in honey  
724 bee larvae and description of *Parasaccharibacter apium* gen. nov., sp. nov. *Appl*  
725 *Environ Microbiol* 80: 7460-7472. doi: 10.1128/AEM.02043-14
- 726 Cox-Foster DL, et al. 2007. A metagenomic survey of microbes in honey bee colony  
727 collapse disorder. *Science* 318: 283-287. doi: 10.1126/science.1146498
- 728 Crotti E, et al. 2010. Acetic acid bacteria, newly emerging symbionts of insects. *Appl*  
729 *Environ Microbiol* 76: 6963-6970. doi: 10.1128/AEM.01336-10
- 730 De Roos J, De Vuyst L 2018. Acetic acid bacteria in fermented foods and beverages.  
731 *Curr Opin Biotechnol* 49: 115-119. doi: 10.1016/j.copbio.2017.08.007
- 732 Durbin R 2014. Efficient haplotype matching and storage using the positional  
733 Burrows-Wheeler transform (PBWT). *Bioinformatics* 30: 1266-1272. doi:  
734 10.1093/bioinformatics/btu014
- 735 Ellegaard KM, Engel P 2019. Genomic diversity landscape of the honey bee gut  
736 microbiota. *Nat Commun* 10: 446. doi: 10.1038/s41467-019-08303-0

- 737 Fratini F, Cilia G, Mancini S, Felicioli A 2016. Royal Jelly: An ancient remedy with  
738 remarkable antibacterial properties. *Microbiol Res* 192: 130-141. doi:  
739 10.1016/j.micres.2016.06.007
- 740 Guy L, Kultima JR, Andersson SG 2010. genoPlotR: comparative gene and genome  
741 visualization in R. *Bioinformatics* 26: 2334-2335. doi:  
742 10.1093/bioinformatics/btq413
- 743 Jones CM, Stres B, Rosenquist M, Hallin S 2008. Phylogenetic analysis of nitrite, nitric  
744 oxide, and nitrous oxide respiratory enzymes reveal a complex evolutionary history  
745 for denitrification. *Mol Biol Evol* 25: 1955-1966. doi: 10.1093/molbev/msn146
- 746 Kapheim KM, et al. 2015. Caste-specific differences in hindgut microbial  
747 communities of honey bees (*Apis mellifera*). *PLoS One* 10: e0123911. doi:  
748 10.1371/journal.pone.0123911
- 749 Katoh K, Standley DM 2013. MAFFT multiple sequence alignment software version  
750 7: improvements in performance and usability. *Mol Biol Evol* 30: 772-780. doi:  
751 10.1093/molbev/mst010
- 752 Kay M, Wobbrock J. 2016. ARTool: Aligned Rank Transform for Nonparametric  
753 Factorial ANOVAs, R package version 0.10.0.
- 754 Kešnerová L, Emery O, Troilo M, Erkosar B, Engel P 2019. Gut microbiota structure  
755 differs between honey bees in winter and summer. *bioRxiv*: 703512. doi:  
756 10.1101/703512
- 757 Kesnerova L, et al. 2017. Disentangling metabolic functions of bacteria in the honey  
758 bee gut. *PLoS Biol* 15: e2003467. doi: 10.1371/journal.pbio.2003467

- 759 Kim EK, et al. 2012. Draft genome sequence of *Commensalibacter intestini* A911T, a  
760 symbiotic bacterium isolated from *Drosophila melanogaster* intestine. *J Bacteriol*  
761 194: 1246. doi: 10.1128/JB.06669-11
- 762 Komagata K, Iino T, Yamada Y. 2014. The Family Acetobacteraceae. In: Rosenberg E,  
763 DeLong EF, Lory S, Stackebrandt E, Thompson F, editors. *The Prokaryotes:*  
764 *Alphaproteobacteria and Betaproteobacteria*. Berlin, Heidelberg: Springer Berlin  
765 Heidelberg. p. 3-78.
- 766 Kwong WK, et al. 2017. Dynamic microbiome evolution in social bees. *Sci Adv* 3:  
767 e1600513. doi: 10.1126/sciadv.1600513
- 768 Kwong WK, Moran NA 2016. Gut microbial communities of social bees. *Nat Rev*  
769 *Microbiol* 14: 374-384. doi: 10.1038/nrmicro.2016.43
- 770 Lee I, Ouk Kim Y, Park SC, Chun J 2016. OrthoANI: An improved algorithm and  
771 software for calculating average nucleotide identity. *Int J Syst Evol Microbiol* 66:  
772 1100-1103. doi: 10.1099/ijsem.0.000760
- 773 Li L, et al. 2016. Whole-Genome Sequence Analysis of *Bombella intestini* LMG  
774 28161T, a Novel Acetic Acid Bacterium Isolated from the Crop of a Red-Tailed  
775 Bumble Bee, *Bombus lapidarius*. *PLoS One* 11: e0165611. doi:  
776 10.1371/journal.pone.0165611
- 777 Li L, et al. 2015. *Bombella intestini* gen. nov., sp. nov., an acetic acid bacterium  
778 isolated from bumble bee crop. *Int J Syst Evol Microbiol* 65: 267-273. doi:  
779 10.1099/ijms.0.068049-0

- 780 Li L, Stoeckert CJ, Jr., Roos DS 2003. OrthoMCL: identification of ortholog groups for  
781 eukaryotic genomes. *Genome Res* 13: 2178-2189. doi: 10.1101/gr.1224503
- 782 Maes PW, Rodrigues PA, Oliver R, Mott BM, Anderson KE 2016. Diet-related gut  
783 bacterial dysbiosis correlates with impaired development, increased mortality and  
784 *Nosema* disease in the honeybee (*Apis mellifera*). *Mol Ecol* 25: 5439-5450. doi:  
785 10.1111/mec.13862
- 786 Marreiros BC, et al. 2016. Exploring membrane respiratory chains. *Biochim Biophys*  
787 *Acta* 1857: 1039-1067. doi: 10.1016/j.bbabbio.2016.03.028
- 788 Martinson VG, et al. 2011. A simple and distinctive microbiota associated with honey  
789 bees and bumble bees. *Mol Ecol* 20: 619-628. doi: 10.1111/j.1365-  
790 294X.2010.04959.x
- 791 Martinson VG, Moy J, Moran NA 2012. Establishment of characteristic gut bacteria  
792 during development of the honeybee worker. *Appl Environ Microbiol* 78: 2830-  
793 2840. doi: 10.1128/AEM.07810-11
- 794 Matsushita K, Matsutani M. 2016. Distribution, Evolution, and Physiology of  
795 Oxidative Fermentation. In: Matsushita K, Toyama H, Tonouchi N, Okamoto-  
796 Kainuma A, editors. *Acetic Acid Bacteria: Ecology and Physiology*. Tokyo: Springer  
797 Japan. p. 159-178.
- 798 Moran NA, Hansen AK, Powell JE, Sabree ZL 2012. Distinctive gut microbiota of  
799 honey bees assessed using deep sampling from individual worker bees. *PLoS One* 7:  
800 e36393. doi: 10.1371/journal.pone.0036393



- 801 Mullins EA, Francois JA, Kappock TJ 2008. A specialized citric acid cycle requiring  
802 succinyl-coenzyme A (CoA):acetate CoA-transferase (AarC) confers acetic acid  
803 resistance on the acidophile *Acetobacter aceti*. *J Bacteriol* 190: 4933-4940. doi:  
804 10.1128/JB.00405-08
- 805 Munoz-Gomez SA, et al. 2019. An updated phylogeny of the Alphaproteobacteria  
806 reveals that the parasitic Rickettsiales and Holosporales have independent origins.  
807 *Elife* 8. doi: 10.7554/eLife.42535
- 808 Ohashi K, Natori S, Kubo T 1999. Expression of amylase and glucose oxidase in the  
809 hypopharyngeal gland with an age-dependent role change of the worker honeybee  
810 (*Apis mellifera* L.). *European Journal of Biochemistry* 265: 127-133. doi:  
811 10.1046/j.1432-1327.1999.00696.x
- 812 Parks DH, et al. 2018. A standardized bacterial taxonomy based on genome  
813 phylogeny substantially revises the tree of life. *Nat Biotechnol* 36: 996-1004. doi:  
814 10.1038/nbt.4229
- 815 Pedraza RO. 2016. Acetic Acid Bacteria as Plant Growth Promoters. In: Matsushita  
816 K, Toyama H, Tonouchi N, Okamoto-Kainuma A, editors. *Acetic Acid Bacteria:  
817 Ecology and Physiology*. Tokyo: Springer Japan. p. 101-120.
- 818 Powell JE, Eiri D, Moran NA, Rangel J 2018. Modulation of the honey bee queen  
819 microbiota: Effects of early social contact. *PLoS One* 13: e0200527. doi:  
820 10.1371/journal.pone.0200527

- 821 Pruesse E, Peplies J, Glockner FO 2012. SINA: accurate high-throughput multiple  
822 sequence alignment of ribosomal RNA genes. *Bioinformatics* 28: 1823-1829. doi:  
823 10.1093/bioinformatics/bts252
- 824 Rissman AI, et al. 2009. Reordering contigs of draft genomes using the Mauve  
825 aligner. *Bioinformatics* 25: 2071-2073. doi: 10.1093/bioinformatics/btp356
- 826 Rognes T, Flouri T, Nichols B, Quince C, Mahe F 2016. VSEARCH: a versatile open  
827 source tool for metagenomics. *PeerJ* 4: e2584. doi: 10.7717/peerj.2584
- 828 Roh SW, et al. 2008. Phylogenetic characterization of two novel commensal bacteria  
829 involved with innate immune homeostasis in *Drosophila melanogaster*. *Appl*  
830 *Environ Microbiol* 74: 6171-6177. doi: 10.1128/AEM.00301-08
- 831 Segers FH, Kesnerova L, Kosoy M, Engel P 2017. Genomic changes associated with  
832 the evolutionary transition of an insect gut symbiont into a blood-borne pathogen.  
833 *ISME J* 11: 1232-1244. doi: 10.1038/ismej.2016.201
- 834 Servin-Garciduenas LE, Sanchez-Quinto A, Martinez-Romero E 2014. Draft Genome  
835 Sequence of *Commensalibacter papalotli* MX01, a Symbiont Identified from the Guts  
836 of Overwintering Monarch Butterflies. *Genome Announc* 2. doi:  
837 10.1128/genomeA.00128-14
- 838 Shin SC, et al. 2011. *Drosophila* microbiome modulates host developmental and  
839 metabolic homeostasis via insulin signaling. *Science* 334: 670-674. doi:  
840 10.1126/science.1212782
- 841 Simo K, Christensen GM 1962. Quantitative analysis of sugars in royal jelly. *Nature*  
842 196: 1208-1209. doi: 10.1038/1961208a0

- 843 Siozios S, Moran J, Chege M, Hurst GDD, Paredes JC 2019. Complete Reference  
844 Genome Assembly for Commensalibacter sp. Strain AMU001, an Acetic Acid  
845 Bacterium Isolated from the Gut of Honey Bees. Microbiol Resour Announc 8. doi:  
846 10.1128/MRA.01459-18
- 847 Smith EA, Newton ILG 2018. Genomic signatures of honey bee association in an  
848 acetic acid symbiont. bioRxiv: 367490. doi: 10.1101/367490
- 849 Stamatakis A 2014. RAxML version 8: a tool for phylogenetic analysis and post-  
850 analysis of large phylogenies. Bioinformatics 30: 1312-1313. doi:  
851 10.1093/bioinformatics/btu033
- 852 Tarpy DR, Mattila HR, Newton IL 2015. Development of the honey bee gut  
853 microbiome throughout the queen-rearing process. Appl Environ Microbiol 81:  
854 3182-3191. doi: 10.1128/AEM.00307-15
- 855 Veress A, Wilk T, Kiss J, Olsasz F, Papp PP 2017. Draft Genome Sequences of  
856 Saccharibacter sp. Strains 3.A.1 and M18 Isolated from Honey and a Honey Bee  
857 (*Apis mellifera*) Stomach. Genome Announc 5. doi: 10.1128/genomeA.00744-17
- 858 Vojvodic S, Rehan SM, Anderson KE 2013. Microbial gut diversity of Africanized and  
859 European honey bee larval instars. PLoS One 8: e72106. doi:  
860 10.1371/journal.pone.0072106
- 861 Yamada Y, Yukphan P 2008. Genera and species in acetic acid bacteria. Int J Food  
862 Microbiol 125: 15-24. doi: 10.1016/j.ijfoodmicro.2007.11.077

863 Yun JH, Lee JY, Hyun DW, Jung MJ, Bae JW 2017. *Bombella apis* sp. nov., an acetic  
864 acid bacterium isolated from the midgut of a honey bee. *Int J Syst Evol Microbiol* 67:  
865 2184-2188. doi: 10.1099/ijsem.0.001921

866 Zhang J, Kobert K, Flouri T, Stamatakis A 2014. PEAR: a fast and accurate Illumina  
867 Paired-End reAd mergeR. *Bioinformatics* 30: 614-620. doi:  
868 10.1093/bioinformatics/btt593

869

870

871 **Figure and Tables**

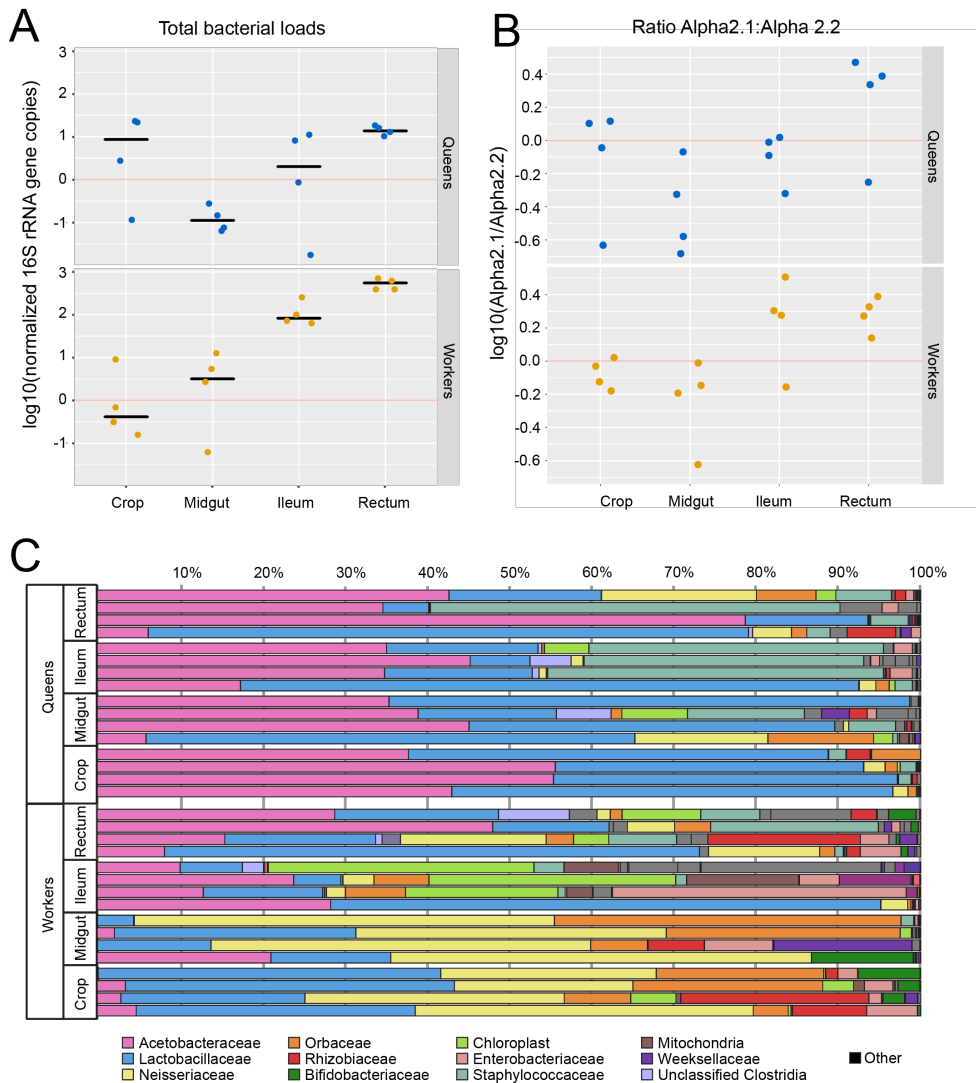

872

873 **Figure 1.** Community analysis of different gut compartments of adult worker and

874 queen bees (n=4 for each category). (A) Total bacterial loads in different gut

875 compartments assessed by qPCR using universal 16S rRNA gene primers and

876 expressed as 16SrRNA copies per host actin copy. (B) Abundance of Alpha2.1 relative

877 to Alpha2.2 in the four gut compartments of worker and queen bees. (C) Bar plot

878 depicting the community composition per gut compartment and caste as relative

879 abundance at the family level.

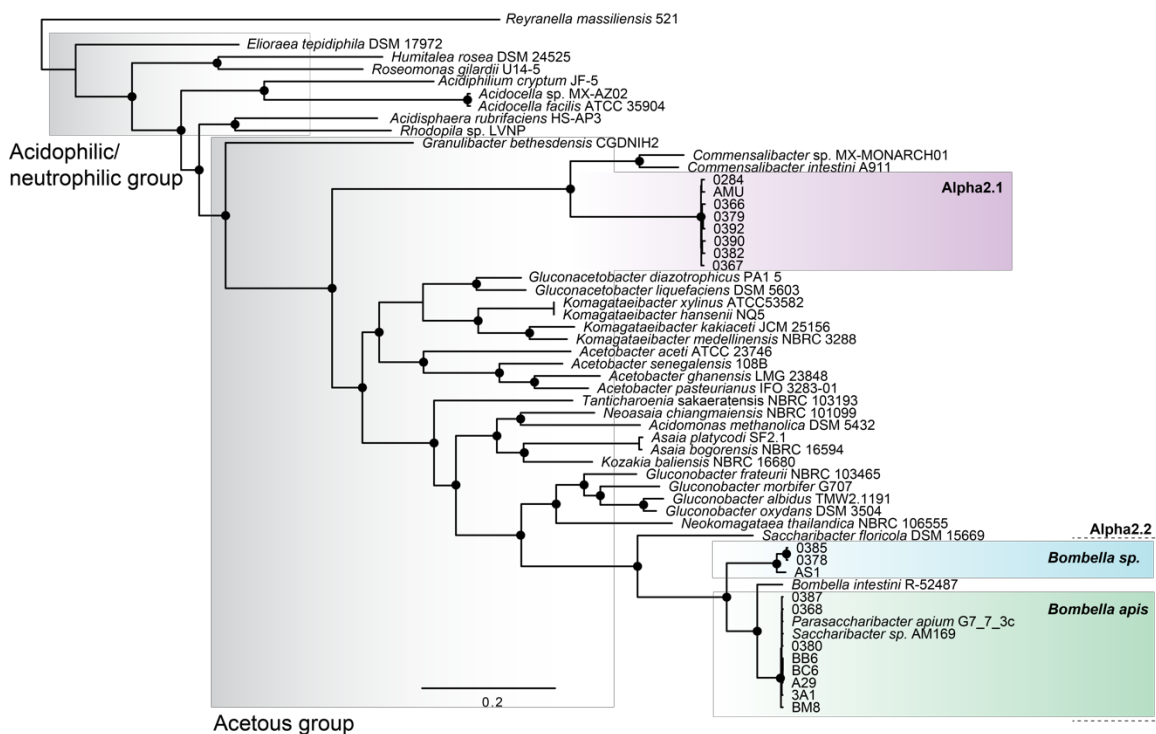

880  
881

882 **Figure 2.** Genome-wide phylogeny of Acetobacteraceae based on 361 single-copy  
883 core genes. The tree was inferred using maximum likelihood. Filled circles indicate  
884 bootstrap value of 100 out of 100 replicates. Branches without circles indicate  
885 bootstrap values <80. The length of the bar indicates 0.2 amino acid substitutions per  
886 site. The three clades of interest are highlighted in magenta, blue, and green. The  
887 acetous and acidophilic/neutrophilic groups are indicated by shades of grey.  
888 Accession numbers of the Alpha2.1 and Alpha2.2 strains can be found in Table S1.

889  
890

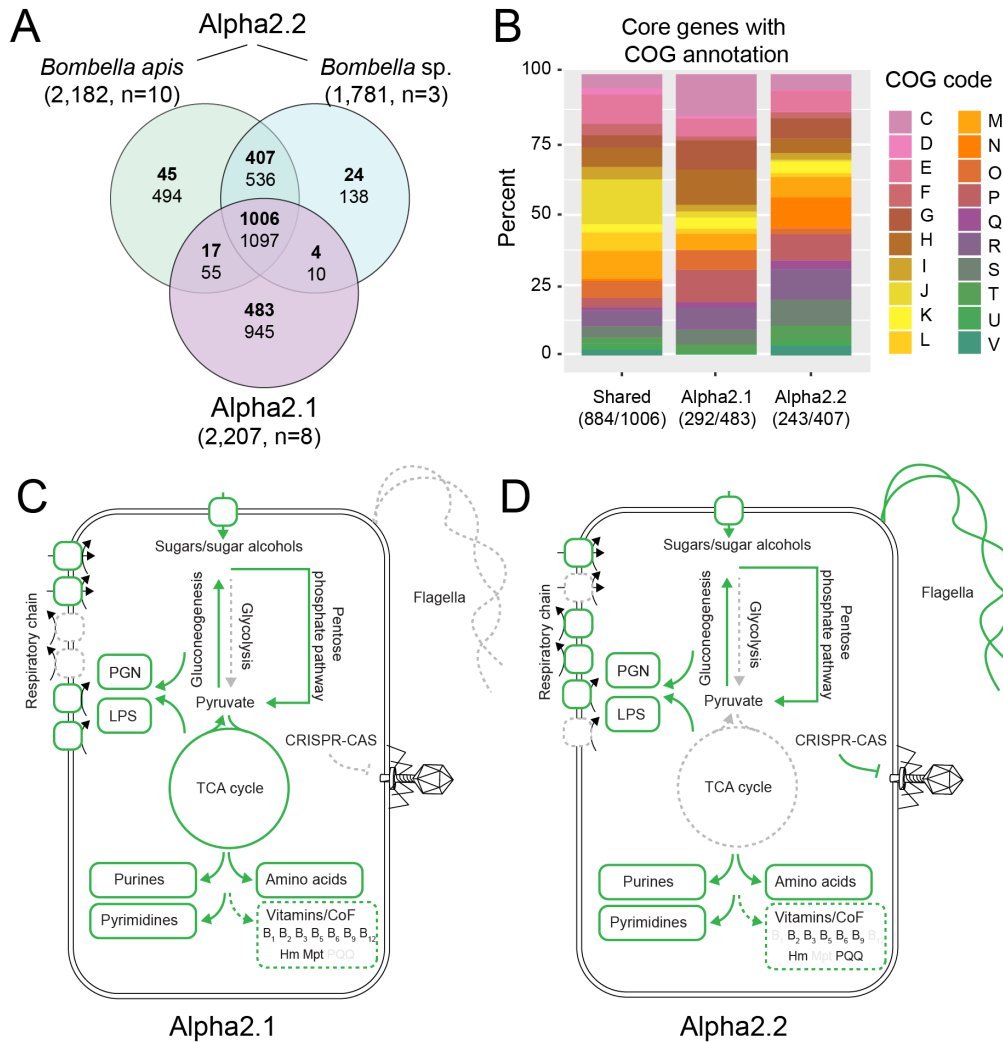

891

892 **Figure 3.** Distribution of gene families among the phylotypes Alpha2.1 and Alpha2.2

893 and overview of their major functional capabilities. (A) Venn diagram depicting

894 shared and unique gene families in the three phylotypes (Alpha2.1 and the two

895 Alpha2.2 sublineages *Bombella apis* and *Bombella sp.*). Gene families present in all

896 genomes of a given group (i.e. core genes) are indicated in bold font, and gene families

897 present in at least one genome (i.e. pangenome) are indicated in normal font.

898 Numbers in brackets indicate total gene families found for each clade. Notably, the

899 number of analyzed genomes (indicated by n) can influence the number of pan and

900 core gene families. (B) Distribution of shared and phylotype-specific core gene  
901 families grouped by COG categories. Numbers in brackets indicate number of core  
902 genes with annotation and total number of core genes. (C) and (D) Summary of the  
903 major functional capabilities of Alpha2.1 and Alpha2.2 based on the shared and the  
904 phylotype-specific gene content. Dashed lines indicated pathways and biosynthetic  
905 capabilities missing in the respective phylotype. Solid lines indicate the presence of  
906 pathway. LPS, lipopolysaccharide, PGN, peptidoglycan, CoF, cofactor; Hm, heme; MPT,  
907 molybdopterin; PQQ, pyrroloquinoline quinone.



908

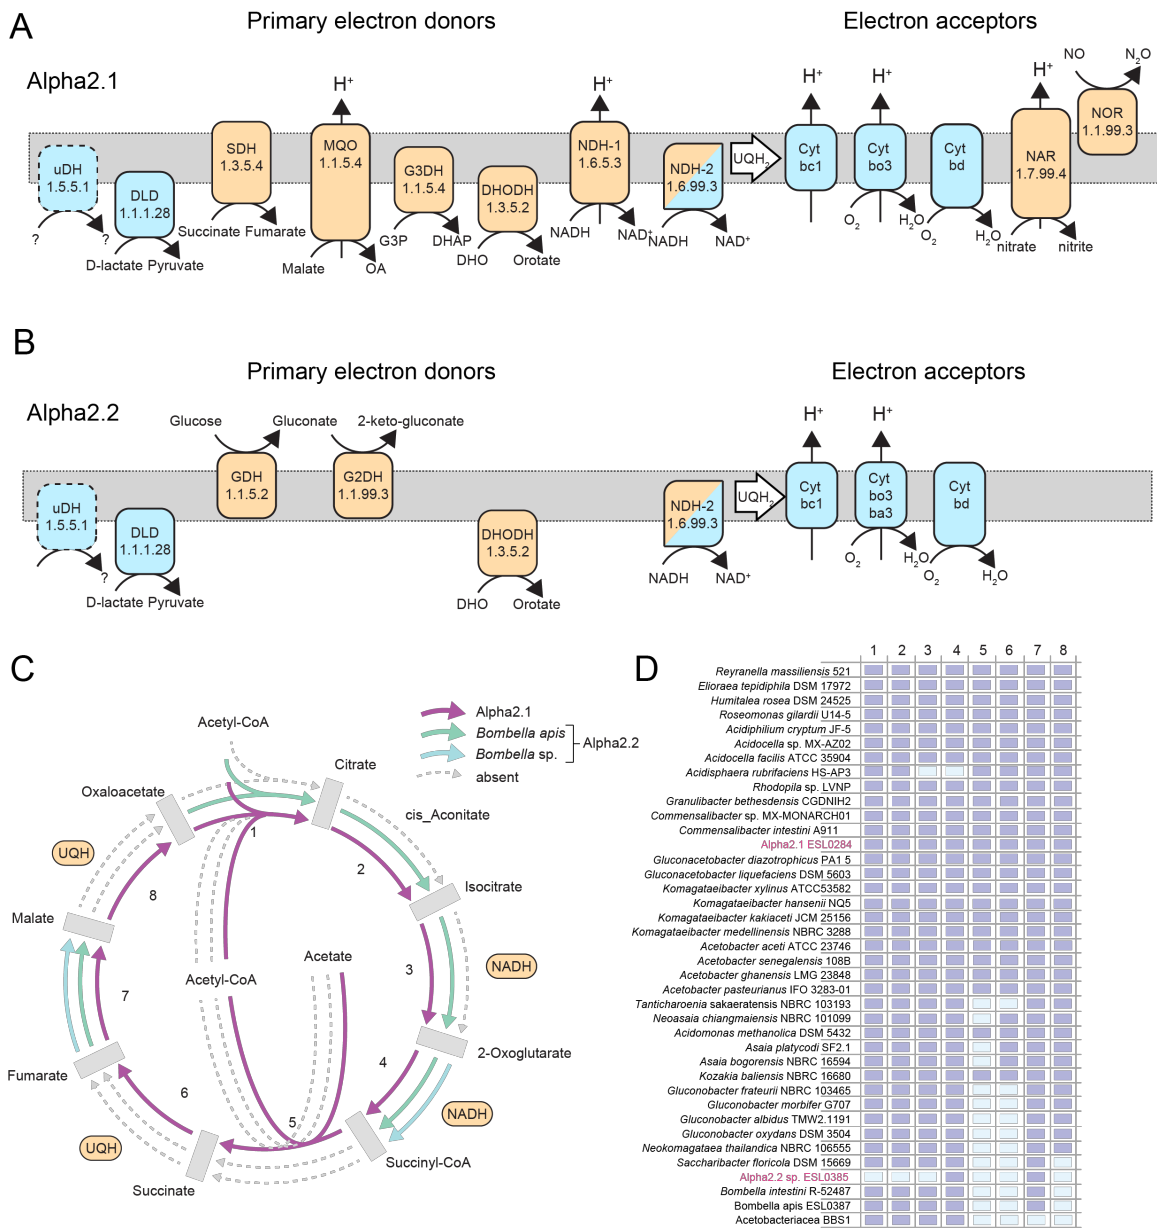

909

910 **Figure 4.** Respiratory chain of Alpha2.1 (A) and Alpha2.2 (B). Shared components are  
 911 shown in blue, phylotype-specific functions are shown in tan. Dashed outlines  
 912 indicate that this function is not conserved in all sequenced strains. Both colors  
 913 indicate the presence of two copies of this function, one which is phylotype-specific,  
 914 another one which is shared among the two. UQH<sub>2</sub> depicts the ubiquinone pool (C)  
 915 TCA cycle completeness in Alpha2.1 and both Alpha2.2 sub-lineages, *Bombella apis*

916 and *Bombella* sp. Steps where electrons are transferred to ubiquinone (UQH) and  
917 NADH are indicated. (D) Completeness of the TCA cycle across Acetobacteraceae  
918 strains shown in Figure 1, including a recently described strain isolated from the gut  
919 of an ant, Acetobacteraceae BBS1, which also has an incomplete TCA cycle (Brown  
920 and Wernegreen 2019). DLD, D-lactate dehydrogenase; SDH, succinate  
921 dehydrogenase; MQH, maltate:quinone oxidoreductase; G3DH, glycerol-3-phosphate  
922 dehydrogenase; DHOHD, dihydroorotate dehydrogenase; NDH-1, NADH  
923 dehydrogenase type 1; NDH-2, NADH dehydrogenase type 2; NAR, nitrate reductase;  
924 NOR, nitric oxide reductase; uDH, unknown flavoprotein dehydrogenase; GDH, PQQ-  
925 dependent glucose dehydrogenase; G2DH, gluconate 2-dehydrogenase, UBQ<sub>2</sub>,  
926 ubiquinone-2; Cyt, cytochrome. 1, Citrate synthase; 2, Aconitate hydratase; 3,  
927 Isocitrate dehydrogenase; 4, 2-oxoglutarate dehydrogenase; 5, Succinyl-CoA:acetate  
928 CoA-transferase (*aarC*); 6, Succinate dehydrogenase; 7, Fumarase class II; 8, Malate  
929 dehydrogenase (*mgo*).

930
